# Supplementary material for: Determinants of Refugee and Migrant Health Status in 10 European Countries: The Mig-HealthCare Project
Source: Int J Environ Res Public Health. 2020 Aug 31;17(17):6353. doi: 10.3390/ijerph17176353 (PMC7503735; doi:10.3390/ijerph17176353)
Supplement: Supplementary file 1 [file ijerph-17-06353-s001.pdf]

## Supplementary Materials

**Table 1.** Characteristics of the total migrants and refugees (N=1407).

|                                                      | <b><i>N (%)</i></b>                     |
|------------------------------------------------------|-----------------------------------------|
| <u><i>Country of Interview</i></u>                   |                                         |
| Austria                                              | 126 (8.96)                              |
| Bulgaria                                             | 226 (16.06)                             |
| Cyprus                                               | 110 (7.82)                              |
| France                                               | 64 (4.55)                               |
| Germany                                              | 11 (0.78)                               |
| Greece                                               | 255 (18.12)                             |
| Italy                                                | 271 (19.26)                             |
| Malta                                                | 38 (2.7)                                |
| Spain                                                | 202 (14.36)                             |
| Sweden                                               | 104 (7.39)                              |
| <u><i>Five most frequent countries of origin</i></u> |                                         |
| Syria                                                | 294 (21.15)                             |
| Afghanistan                                          | 211 (15.18)                             |
| Iraq                                                 | 127 (9.14)                              |
| Nigeria                                              | 118 (8.49)                              |
| Iran                                                 | 48 (3.45)                               |
| Males                                                | 889 (63.18)                             |
| Final Destination (Yes)                              | 979 (72.73)                             |
| Asylum (Yes)                                         | 358 (28.94)                             |
| Other kind of permission (Yes)                       | 619 (46.37)                             |
|                                                      | <b><i>Mean ± Standard deviation</i></b> |
| Age (years)                                          | 31.98±11.05                             |
| BMI (kg/m <sup>2</sup> )                             | 24.79±4.42                              |
| Education (years)                                    | 9.1±5                                   |

**Table 2.** Characteristics of migrants and refugees by country of interview.

|                          | Austria<br>(N=126) | Bulgaria<br>(N=226) | Cyprus<br>(N=110) | France<br>(N=64) | Germany<br>(N=11) | Greece<br>(N=255) | Italy<br>(N=271) | Malta<br>(N=38) | Spain<br>(N=202) | Sweden<br>(N=104) |
|--------------------------|--------------------|---------------------|-------------------|------------------|-------------------|-------------------|------------------|-----------------|------------------|-------------------|
| <u>Country of origin</u> | 31(24.1)           | 74(32.7)            | 26(23.6)          | 2(3.13)          | 9(81.82)          | 105(41.2)         | 2(0.74)          | 2(5.26)         | 2(0.99)          | 41(39.4)          |

|         |         |          |         |         |          |         |         |         |         |         |
|---------|---------|----------|---------|---------|----------|---------|---------|---------|---------|---------|
| (%)     | 60)     | 4)       | 4)      | 22(34.  | )        | 18)     | 1(0.37) | 2(5.26) | 2(0.99) | 2)      |
| Syria   | 10      | 74(32.7  | 0(0)    | 38)     | 0(0)     | 91(35.6 | 0(0)    | 5(13.16 | 0(0)    | 9(8.65) |
| Afghani | (7.94)  | 4)       | 21(19.0 | 0(0)    | 0(0)     | 9)      | 97(35.  | )       | 1(0.5)  | 7(6.73) |
| stan    | 26(20.  | 36(15.9  | 9)      | 0(0)    | 0(0)     | 32(12.5 | 79)     | 3(7.89) | 0(0)    | 3(2.88) |
| Iraq    | 63)     | 3)       | 4(3.64) | 0(0)    | 0(0)     | 5)      | 0(0)    | 0(0)    | 197(97. | 4(3.85) |
| Nigeria | 9(7.14) | 1(0.44)  | 0(0)    | 40      | 2        | 0(0)    | 171(63  | 26(68.4 | 52)     | 40(38.4 |
| Iran    | 6(4.76) | 21(9.29  | 59(53.6 | (62.50) | (18.18)  | 17(6.67 | .10)    | 2)      |         | 6)      |
| Other   | 44      | )        | 4)      |         |          | )       |         |         |         |         |
|         | (34.92) | 20       |         |         |          | 10(3.92 |         |         |         |         |
|         |         | (8.85)   |         |         |          | )       |         |         |         |         |
| Males   | 63 (50) | 142      | 65      | 45      | 3        | 149     | 236     | 25      | 114     | 47      |
| (%)     |         | (62.83)  | (59.09) | (70.31) | (27.27)  | (58.43) | (87.08) | (65.79) | (56.44) | (45.19) |
| Final   |         |          |         |         |          |         |         |         |         |         |
| Destina | 92      | 138      | 74      | 44      | 11 (100) | 84      | 246     | 16      | 180     | 94      |
| tion    | (74.19) | (61.61)  | (68.52) | (91.67) |          | (36.21) | (93.18) | (51.61) | (89.11) | (92.16) |
| (%Yes)  |         |          |         |         |          |         |         |         |         |         |
| Asylum  | 54      | 30       | 21      | 27      | 3        | 85      | 41      | 8       | 47      | 42      |
| (%Yes)  | (43.20) | (23.26)  | (20.39) | (65.85) | (27.27)  | (37.61) | (15.47) | (23.53) | (23.62) | (40.38) |
| Other   |         |          |         |         |          |         |         |         |         |         |
| permiss | 65      | 1 (0.44) | 56      | 19      | 8 (80)   | 101     | 211     | 30      | 72      | 56      |
| ion     | (52.85) |          | (54.90) | (43.18) |          | (44.69) | (79.32) | (90.91) | (35.82) | (53.85) |
| (%Yes)  |         |          |         |         |          |         |         |         |         |         |
| Age     | 31.63±  | 31.57±1  | 34.20±1 | 28.92±  | 44.64±1  | 34.88±1 | 25.27±  | 34.11±1 | 35.38±1 | 35.32±1 |
| (years) | 9.82    | 2.01     | 0.43    | 7.72    | 6.64     | 0.20    | 5.76    | 1.08    | 2.86    | 1.43    |
| BMI     | 24.42±  | 24.79±4  | 26.29±4 | 24.90±  | 26.53±5  | 25.03±5 | 23.79±  | 24.40±3 | 24.90±4 | 25.39±5 |
| (kg/m²) | 4.11    | .62      | .10     | 5.83    | .21      | .20     | 2.98    | .77     | .10     | .30     |

| Table 3. Health status of migrants and refugees. |             |
|--------------------------------------------------|-------------|
|                                                  | N (%)       |
| Headaches / Migraines                            | 179 (12.72) |
| Presence of mental health problem                | 108 (7.68)  |
| Sleep disorders                                  | 95 (6.75)   |
| Illness related to bone and muscle               | 89 (6.33)   |
| Gastrointestinal disease                         | 82 (5.83)   |
| Respiratory disease                              | 72 (5.12)   |
| Diabetes                                         | 59 (4.19)   |
| Hypertension                                     | 59 (4.19)   |
| Chronic problems from Injury/accidents           | 51 (3.63)   |
| Heart disease                                    | 44 (3.13)   |
| Kidney disease                                   | 35 (2.49)   |
| Tuberculosis                                     | 9 (0.64)    |
| Cancer                                           | 6 (0.43)    |
| AIDS/HIV                                         | 5 (0.36)    |
| Brain stroke                                     | 4 (0.29)    |
| General Health score (mean±sd)                   | 63.6±23.4   |

| Table 4. Access and interaction with health care services. |       |
|------------------------------------------------------------|-------|
|                                                            | N (%) |

|                                                                                              |            |
|----------------------------------------------------------------------------------------------|------------|
| Inability to access health care services during the last 6 months.                           | 603 (45.2) |
| Need for a translator during their interactions with healthcare services:                    |            |
| Never                                                                                        | 348 (26.7) |
| Few times                                                                                    | 237 (18.2) |
| Most times                                                                                   | 253 (19.4) |
| Always                                                                                       | 464 (35.6) |
| Did you need to take medication and were not able to?                                        |            |
| Not needed                                                                                   | 430 (38.5) |
| Needed and had access                                                                        | 541 (48.5) |
| Needed and was not able to take it                                                           | 145 (13.0) |
| Do you believe that you have worse access to health services compared to local people? (Yes) | 322 (26.7) |

**Table 5.** Multivariable linear regression models regarding physical and mental health status, country of interview, and country of origin in migrants and refugees with general health as a dependent variable.

| <b>Model 1 (N=1129)</b>                            | Estimates | P-value          | 95% Confidence Interval |
|----------------------------------------------------|-----------|------------------|-------------------------|
| Presence of mental health problem                  | -15.45    | <b>&lt;0.001</b> | (-20.28 , -10.63)       |
| Heart disease                                      | -15.13    | <b>&lt;0.001</b> | (-22.89 , -7.37)        |
| Illness related to bone and muscle                 | -11.24    | <b>&lt;0.001</b> | (-16.63 , -5.86)        |
| Hypertension                                       | -11.91    | <b>&lt;0.001</b> | (-18.89 , -4.94)        |
| Gastrointestinal disease                           | -7.59     | <b>&lt;0.001</b> | (-12.78 , -2.41)        |
| Respiratory disease                                | -8.35     | <b>0.003</b>     | (-13.85 , -2.84)        |
| Cancer                                             | -24.57    | <b>0.006</b>     | (-42.04 , -7.11)        |
| Tuberculosis                                       | -20.6     | <b>0.005</b>     | (-34.8 , -6.41)         |
| Kidney disease                                     | -8.87     | <b>0.041</b>     | (-17.39 , -0.35)        |
| <b>Model 2 (N=1129)</b>                            |           |                  |                         |
| Presence of mental health problem                  | -14.31    | <b>&lt;0.001</b> | (-19.39 , -9.23)        |
| Sleep disorders                                    | 0.54      | 0.841            | (-4.78 , 5.87)          |
| Headaches / Migraines                              | -1.97     | 0.324            | (-5.88 , 1.94)          |
| Having one disease or chronic condition            | -2.74     | 0.085            | (-5.86 , 0.38)          |
| Having at least two diseases or chronic conditions | -16.65    | <b>&lt;0.001</b> | (-20.4 , -12.9)         |
| <b>Model 3 (N=1054)</b>                            |           |                  |                         |
| Germany or Austria as country of interview*        | 8.66      | <b>0.002</b>     | (3.21 , 14.11)          |
| Bulgaria as country of interview*                  | -6.94     | <b>0.028</b>     | (-13.13 , -0.74)        |
| Spain as country of interview*                     | 9.84      | <b>&lt;0.001</b> | (5.04 , 14.65)          |
| Afghanistan as country of origin*                  | -5.42     | <b>0.032</b>     | (-10.37 , -0.47)        |
| Iraq as country of origin*                         | -7.76     | <b>&lt;0.001</b> | (-12.14 , -3.39)        |
| Nigeria as country of origin*                      | -2.38     | 0.393            | (-7.83 , 3.08)          |
| Other country of origin*                           | -5.4      | 0.095            | (-11.76 , 0.95)         |
| Having other kind of permission                    | 3.23      | <b>0.034</b>     | (0.24 , 6.21)           |
| Having one disease or chronic condition            | -4.94     | <b>0.003</b>     | (-8.18 , -1.71)         |
| Having at least two diseases or chronic conditions | -18.15    | <b>&lt;0.001</b> | (-21.36 , -14.93)       |

\*compared with Italy as country of interview and with Syria as country of origin

All models are adjusted for age and sex. Model 1 is adjusted for diabetes, brain stroke and AIDS/HIV. Model 3 is adjusted for final destination (yes/no), other countries of interview and having asylum (yes/no).

| <b>Table 6.</b> Pearson's correlation for each question with total general health score. |                                                          |
|------------------------------------------------------------------------------------------|----------------------------------------------------------|
| <b>18</b>                                                                                | In general, would you say your health is: good etc.      |
| <b>18a</b>                                                                               | (a) I seem to get sick a little easier than other people |
| <b>18b</b>                                                                               | (b) I am as healthy as anybody I know                    |

|                                      |                                     |
|--------------------------------------|-------------------------------------|
| <b>18c</b>                           | (c) I expect my health to get worse |
| <b>18d</b>                           | (d) My health is excellent          |
| <b>General health scale with 18</b>  | 0.7481045                           |
| <b>General health scale with 18a</b> | 0.68355                             |
| <b>General health scale with 18b</b> | 0.73296                             |
| <b>General health scale with 18c</b> | 0.70759                             |
| <b>General health scale with 18d</b> | 0.83714                             |
